# Supplementary material for: U-Pb direct dating on calcite paleosol nodules: first absolute age constraints on the Miocene continental succession of the Paris Basin
Source: Copernicus journal article supplement (doi:10.5194/egusphere-2024-2325), 2024-08-05
Supplement: Supplementary file [file egusphere-2024-2325-RC1-supplement.pdf]

Review notes for Monchal et al paper entitled “U-Pb direct dating on calcite paleosol nodules: first absolute age constraints on the Miocene continental succession of the Paris Basin “

This paper demonstrates the great applicability potential of latest advances in laser ablation ICPMS U-Pb dating of carbonate material. Paleosol nodules are some of the more complicated materials both in terms of their microstructures and history of diagenesis, thus a successful attempt to date these sedimentary structures has important Implications for many studies to follow and is well deserve for publication in *Geochronology*.

My comments will be focused on the dating part and less on the implications of the dated material for the reconstruction of the Miocene continental succession in the Paris Basin. I am sure other reviewers can cover that part of the paper.

My first comments relate to the study of these texturally complex structures. As well demonstrated, imaging and geochemical understanding of these structures is essential for dating them. The state-of-the-art mapping technique that was developed by the team at Trinity College Dublin is a good application in this type of samples, however, I wonder if some more basic cathodoluminescence imaging could be beneficial here? From my experience, these samples have a long diagenetic history that is hard to observe by SEM/XRD/BS imaging. For example, consider the below image, you can see a clear complexity of fluid composition and/or precipitation conditions as well as overprint phase (bright luminescence). Perhaps, if not too late, the author could provide CL images of the studied sample? I think this could be very nice addition to the textural study if possible.

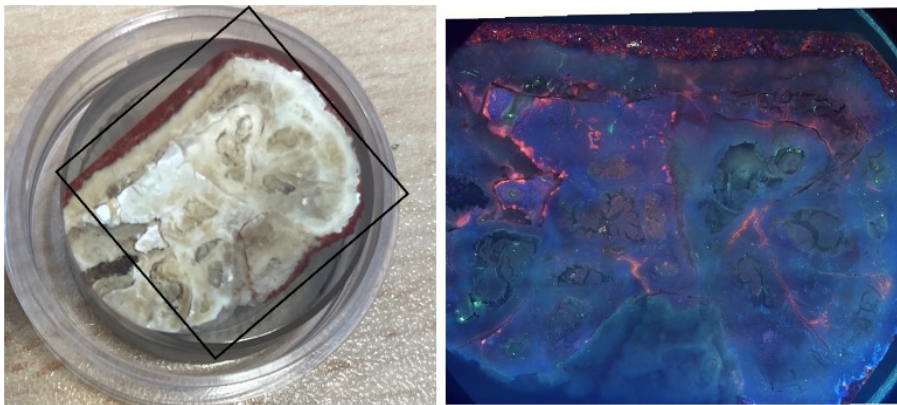

CL image of carbonate nodules from the Jura Mt. in France (unpublished data).

My second comments relate to the obtained U-Pb ages and interpretation. The authors present 6 TW plots (figure 7), however, at the end the whole temporal constraint is based on statistical approach (radial plot in figure 8). I wonder if this interpretation misses a bit the potential diagenetic history of the sedimentary section (from 20.4 and 18 Ma)? One possibility is that the oldest age will better constrain the deposition age and younger ages correspond to diagenetic processes. Alternatively, the oldest ages correspond to reworked material and the youngest ages are the depositional time. I don't know the right answer, but I think there is room for discussion on these options. It will be also interesting to look at sedimentary rates with the obtained ages if available? to see if age of 20 or 19 Ma makes a difference? I don't know how important this 1 Ma difference is, but it is something to be discussed maybe in the text?

In addition, what is the TW age for all spot analyses (of all 6 samples)? And what is the MSWD? If all nodules are considered as the same age and we do not attempt to study their diagenetic history, then why not presenting this age as the age for the section? I would have plotted it myself, but I could not find the “spot” analyses data (to be included?).

Considering the overlap uncertainties, this will not make much difference, however, if in the future the authors could use better primary standards (minimal uncertainties of about 2.5% for the WC1) such as [JT](#), [RA138](#) or [ASH15](#) then the diagenetic history of such samples could be potentially resolved.

More general comments:

#### Introduction

I think a paragraph explaining the formation and diagenetic history of carbonate nodules could be important here. There are lots of studies using mineralogical and geochemistry characterization of such nodules. It will help to associate their precipitation time with sedimentation process, including key observations for their association.

Line 60 – You could add, *Microcodium* dating from Paleocene–Eocene Thermal Maximum in the Southern Pyrenees (Spain) - [Prieur et al 2024](#), *Geology*.

Line 125 - I am not convinced by the assertion that these nodules are not reworked, it will help to provide more microstructural evidence, such as preservation of nodules morphology, age comparison in different sections etc. If not possible to provide, perhaps it is better to mention the possibility and what different it will make? (if reworked from S1-S3? Age is slightly older?).

Section 3.2. Will be great to add cathodoluminescence imaging section if possible.

Line 215 onward – I think the main limitation for the precision here is the primary reference material and not the secondary, as might be understood from this paragraph. The mapping technique is a real state-of-the-art approach; however, it is limited here by the used primary reference material (RMs - WC1), with a minimal uncertainty of 2-2.5%, thus, ages will be plus minus 0.5 Ma for an age of 20 Ma. This notion may help to push forward the use of better RMs in the future.

Line 235 – how do you evaluate recrystallization without XPL imaging on thin-sections and/or cathodoluminescence? Crystal growth morphology is not well documented, so this is not entirely supported by the data provided. For example, Figure 3b and c may look like a single cementation phase with PPL but could show very different CL and XPL characteristics. I don't mean to be difficult here, but I have seen many examples that show this pattern.

Line 320 – The problem with multiple phases of growth is that they can occur at different stages of the diagenetic history. Also it is very hard to observe incremental growth in the provided images.

Line 325 – I find the statistical explanation unnecessarily complicated, I think it can be simplified by first providing comparison for the different approaches such as age constraint based on the:

1. age with lowest uncertainties:  $19.11 \pm 0.94$  Ma
2. TW plots of all “spot” analyses : ???
3. radial plot:  $19.34 \pm 0.73$  Ma
4. mean weighted average :  $19.32 \pm 0.73$  Ma
5. oldest age, to account for post formation diagenetic processes:  $20.4 \pm 1.6$  Ma
6. Youngest age, to account for potential reworked contribution:  $18 \pm 3.2$  Ma

Then you can explain why you choose option number 3?

Overall, I enjoyed reading the paper and I think it is well written and should be published in geochronology. I think a bit more textural control (CL imaging) and discussion on potential interpretation of the data could improve the paper and make it an important contribution for future studies to come that will take similar approaches.

With best wishes,  
Perach Nuriel
