# Supplementary figures and images for: U-Pb direct dating on calcite paleosol nodules: first absolute age constraints on the Miocene continental succession of the Paris Basin
Source: Copernicus journal article supplement (doi:10.5194/egusphere-2024-2325), 2024-08-05

a) P01

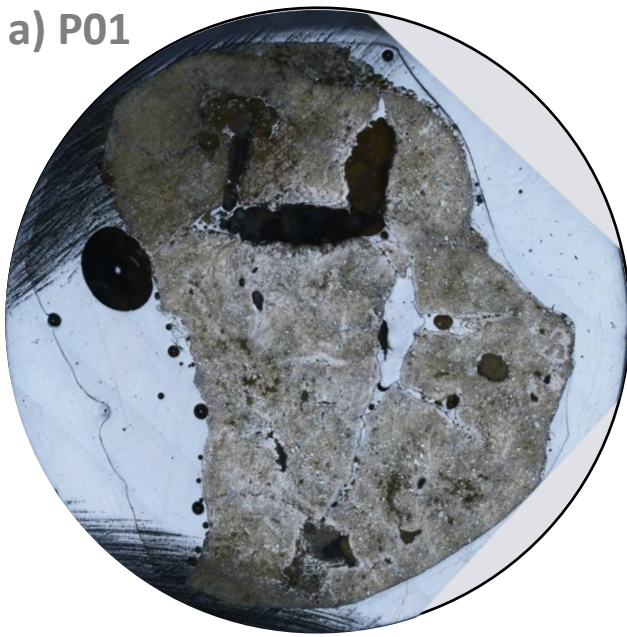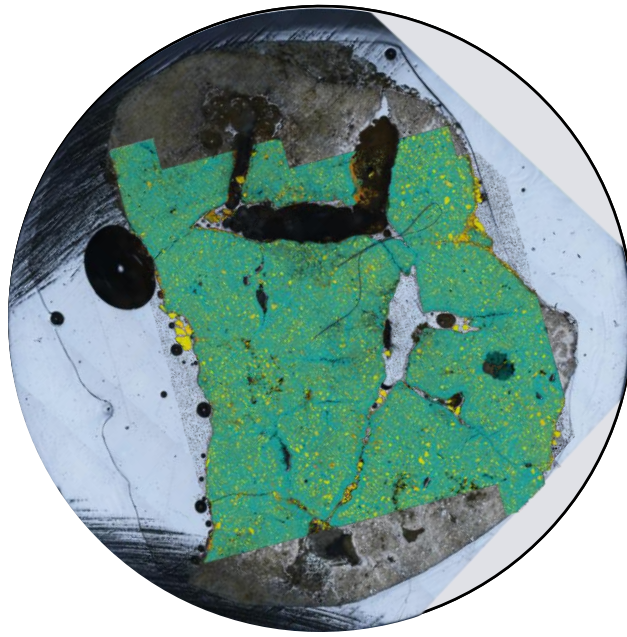

10 mm

*EDS maps*

Ca

Si

K,Na

b) P02

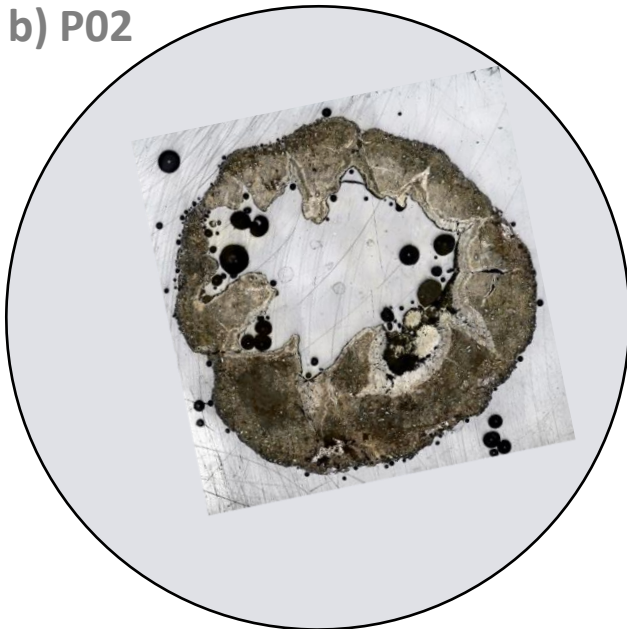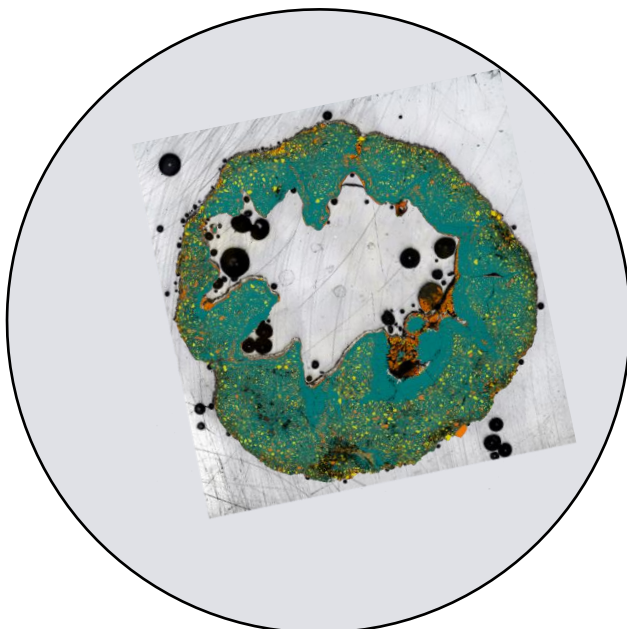

c) P04

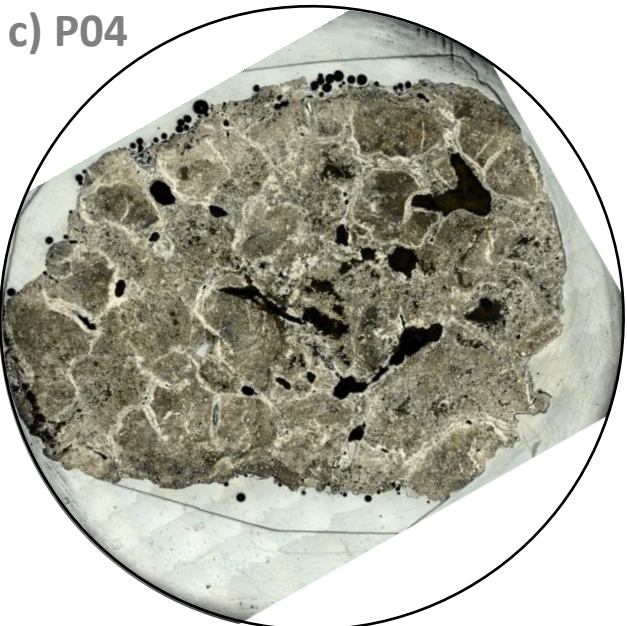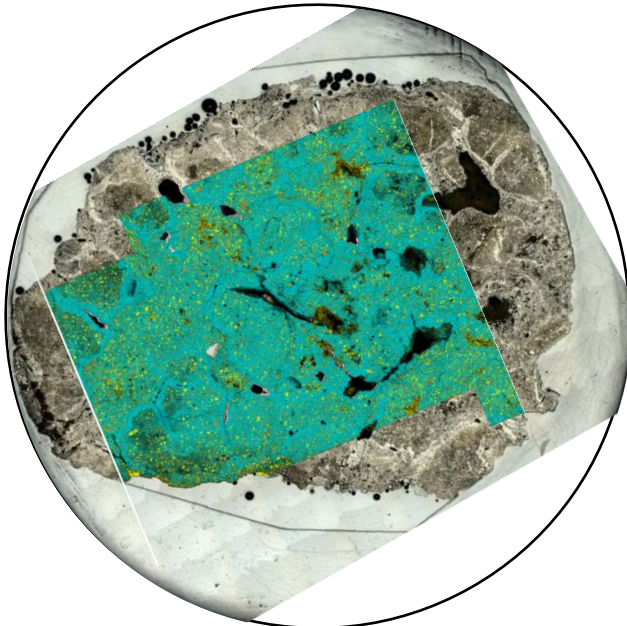

d) P14

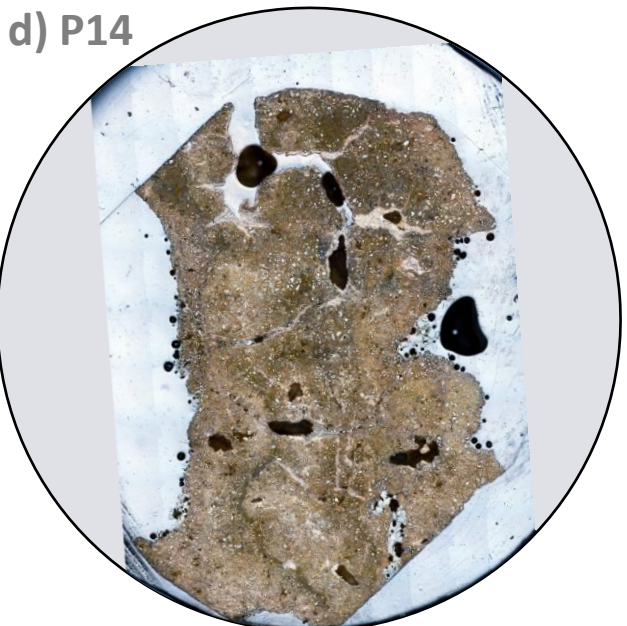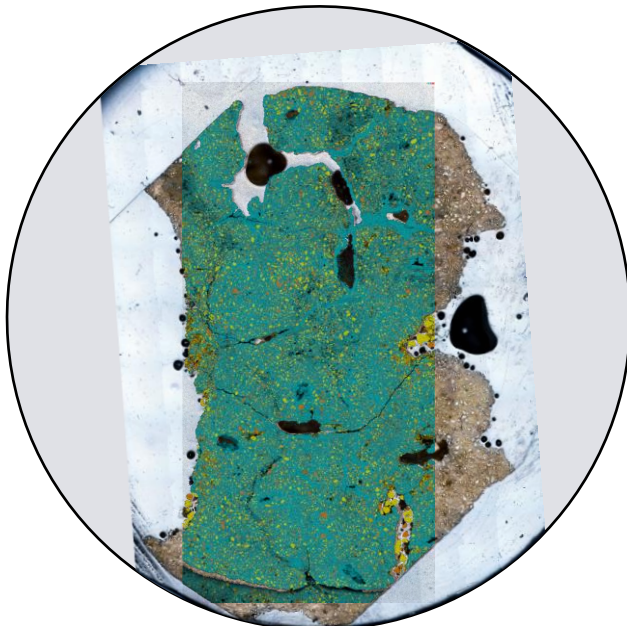

Supplement: Supplementary file 1 [file Supplementary Figure 1 - Photo_EDS.pdf › Supplementary Figure 1 - Photo_EDS.pdf]
